# Supplementary material
Source: HighWire-hosted journal article supplement (https://jnm.snmjournals.org/highwire/filestream/95216/field_highwire_adjunct_files/0/196741_Supplemental_Data.pdf)
Supplement: 196741_Supplemental_Data.pdf [file 196741_Supplemental_Data.pdf]

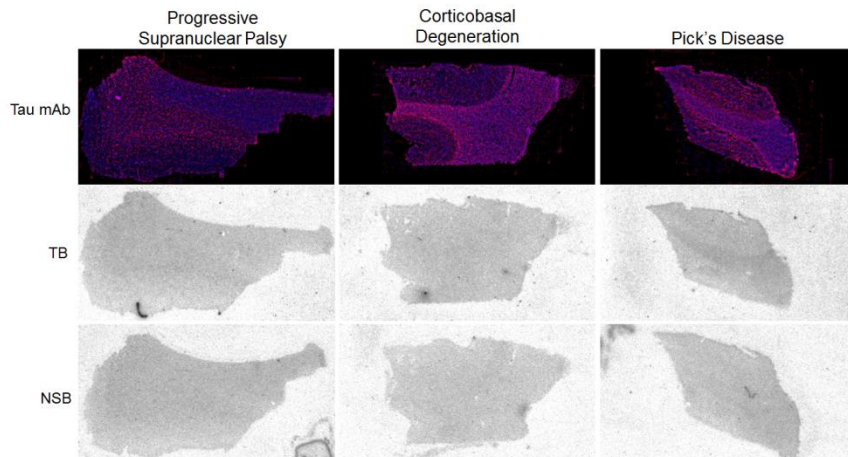

**SUPPLEMENTAL FIGURE 1:** Tau mAb staining of cortical tissue sections from a progressive supranuclear palsy, corticobasal degeneration and Pick's disease patient and corresponding autoradiographies of  $^3\text{H}$ -RO6958948 (3 nM) on adjacent sections in absence and presence of 10  $\mu\text{M}$  T808.

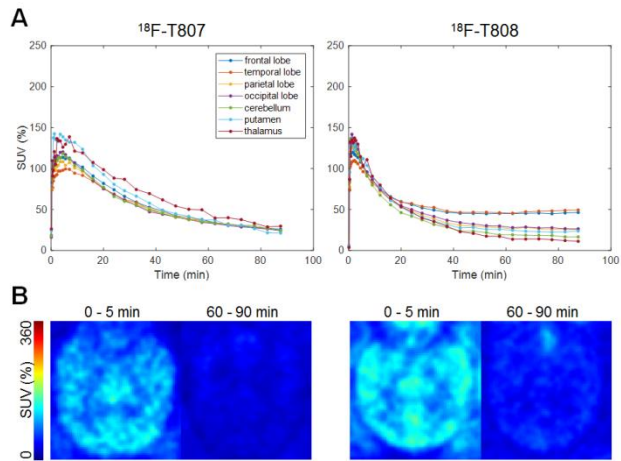

**SUPPLEMENTAL FIGURE 2:** (A) Regional time-activity curves of <sup>18</sup>F-T807 and <sup>18</sup>F-T808 in baboon PET.

(B) Averaged trans-axial images of individual radioligands for earlier and later time points.

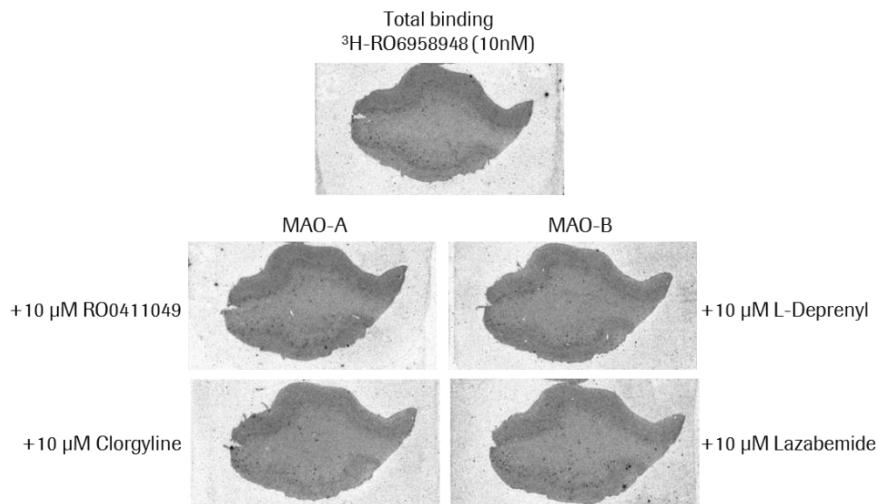

**SUPPLEMENTAL FIGURE 3:** In vitro autoradiography of <sup>3</sup>H-RO6958948 in absence and presence of various MAO-A and MAO-B ligands using native tissue sections of inferior temporal cortex from a Braak V AD tissue donor.

### Supplemental Table 1: Selectivity screens

Selectivity screens were performed at Cerep, France, according to their standard operating procedures (see [www.cerep.com](http://www.cerep.com); for details) using a small panel of representative, frequently hit targets which were identified and selected in a collaborative effort (for details see Peters, JU, Hert, J, Bissantz, C, et al. Can we discover pharmacological promiscuity early in the drug discovery process? *Drug Discov. Today*. 2012;17:325–335)

#### Results for RO6958948

| Target/binding site                       | Species | Concentration ( $\mu\text{M}$ ) | % Inhibition of control |
|-------------------------------------------|---------|---------------------------------|-------------------------|
| 5HT2A                                     | HUMAN   | 10                              | 16                      |
| 5HT2B                                     | HUMAN   | 10                              | 20                      |
| 5HT3                                      | HUMAN   | 10                              | 0                       |
| ACETYLCHOLINESTERASE                      | HUMAN   | 10                              | 59                      |
| ADENOSINE A3 RECEPTOR                     | HUMAN   | 0.0001                          | 7                       |
| ADENOSINE A3 RECEPTOR                     | HUMAN   | 0.001                           | 6                       |
| ADENOSINE A3 RECEPTOR                     | HUMAN   | 0.003                           | 6                       |
| ADENOSINE A3 RECEPTOR                     | HUMAN   | 0.01                            | 25                      |
| ADENOSINE A3 RECEPTOR                     | HUMAN   | 0.03                            | 44                      |
| ADENOSINE A3 RECEPTOR                     | HUMAN   | 0.1                             | 69                      |
| ADENOSINE A3 RECEPTOR                     | HUMAN   | 0.3                             | 82                      |
| ADENOSINE A3 RECEPTOR                     | HUMAN   | 3                               | 96                      |
| ADENOSINE A3 RECEPTOR                     | HUMAN   | 10                              | 97                      |
| ANGIOTENSIN II RECEPTOR 1                 | HUMAN   | 10                              | 2                       |
| CA <sup>2+</sup> CHANNEL (DILTIAZEM SITE) | RAT     | 10                              | -4                      |
| CDK2                                      | HUMAN   | 10                              | -5                      |
| CYCLO OXYGENASE 2                         | HUMAN   | 10                              | -9                      |
| ESTROGEN RECEPTOR alpha                   | HUMAN   | 10                              | -15                     |
| GLYCINE RECEPTOR, STRYCHNINE INSENSITIVE  | RAT     | 10                              | 1                       |

|                            |         |       |      |
|----------------------------|---------|-------|------|
| GSK-3A                     | HUMAN   | 10    | -13  |
| GSK-3B                     | HUMAN   | 10    | -109 |
| HISTAMINE H2 RECEPTOR      | HUMAN   | 10    | 9    |
| HIV-1 PROTEASE             | HUMAN   | 10    | 21   |
| ML3R                       | HAMSTER | 10    | 74   |
| MONOAMINE OXIDASE-A        | HUMAN   | 0.001 | 5    |
| MONOAMINE OXIDASE-A        | HUMAN   | 0.01  | 1    |
| MONOAMINE OXIDASE-A        | HUMAN   | 0.1   | 3    |
| MONOAMINE OXIDASE-B        | HUMAN   | 0.001 | -29  |
| MONOAMINE OXIDASE-B        | HUMAN   | 0.01  | -23  |
| MONOAMINE OXIDASE-B        | HUMAN   | 0.1   | -16  |
| MONOAMINE OXIDASE-B        | HUMAN   | 10    | 10   |
| mu OPIOID RECEPTOR         | HUMAN   | 10    | 48   |
| NICOTINIC RECEPTOR, MUSCLE | HUMAN   | 10    | 2    |
| PCP RECEPTOR               | RAT     | 10    | 3    |
| PHOSPHODIESTERASE 5        | HUMAN   | 10    | 22   |
| PPARgamma                  | HUMAN   | 10    | 2    |
| PROSTAGLANDIN F RECEPTOR   | HUMAN   | 10    | 0    |
| SIGMA                      | HUMAN   | 10    | 11   |
| XANTHINE OXIDASE           | BOVINE  | 10    | 2    |
| ZAP70                      | HUMAN   | 10    | 8    |

#### Results for RO6924963

| Target/binding site | Species | Concentration<br>( $\mu$ M) | % Inhibition of<br>control |
|---------------------|---------|-----------------------------|----------------------------|
| 5HT1A               | HUMAN   | 1                           | 3                          |
| 5HT2A               | HUMAN   | 1                           | -2                         |

|                                             |       |   |     |
|---------------------------------------------|-------|---|-----|
| 5HT2B                                       | HUMAN | 1 | 32  |
| 5HT3                                        | HUMAN | 1 | 6   |
| ACETYLCHOLINESTERASE                        | HUMAN | 1 | 5   |
| ADENOSINE A1 RECEPTOR                       | HUMAN | 1 | -5  |
| ADENOSINE A3 RECEPTOR                       | HUMAN | 1 | 2   |
| alpha1A-ADRENOCEPTOR                        | HUMAN | 1 | 6   |
| alpha2A-ADRENOCEPTOR                        | HUMAN | 1 | 14  |
| ANDROGEN RECEPTOR                           | HUMAN | 1 | -6  |
| ANGIOTENSIN CONVERTING ENZYME               | HUMAN | 1 | -5  |
| ANGIOTENSIN II RECEPTOR 1                   | HUMAN | 1 | -29 |
| beta1-ADRENOCEPTOR                          | HUMAN | 1 | -1  |
| CA2+ CHANNEL (DILTIAZEM SITE)               | RAT   | 1 | 2   |
| CDK2                                        | HUMAN | 1 | -1  |
| CYCLO OXYGENASE 2                           | HUMAN | 1 | 17  |
| DOPAMINE D1 RECEPTOR                        | HUMAN | 1 | -3  |
| DOPAMINE D2 RECEPTOR (short)                | HUMAN | 1 | -3  |
| ESTROGEN RECEPTOR alpha                     | HUMAN | 1 | -9  |
| GABA-A (BENZODIAZAPINE BINDING SITE)        | RAT   | 1 | -4  |
| GLUCOCORTICOID RECEPTOR                     | HUMAN | 1 | -4  |
| GLYCINE RECEPTOR, STRYCHNINE<br>INSENSITIVE | RAT   | 1 | -8  |
| GSK-3A                                      | HUMAN | 1 | 2   |
| GSK-3B                                      | HUMAN | 1 | -1  |
| HISTAMINE H1 RECEPTOR                       | HUMAN | 1 | -6  |
| HISTAMINE H2 RECEPTOR                       | HUMAN | 1 | -11 |
| HISTAMINE H3 RECEPTOR                       | HUMAN | 1 | 1   |
| HIV-1 PROTEASE                              | HUMAN | 1 | 21  |

|                            |         |         |      |
|----------------------------|---------|---------|------|
| kappa OPIOID RECEPTOR      | RAT     | 1       | 5    |
| ML3R                       | HAMSTER | 0.00003 | -7   |
| ML3R                       | HAMSTER | 0.0003  | -11  |
| ML3R                       | HAMSTER | 0.001   | 16   |
| ML3R                       | HAMSTER | 0.003   | 10   |
| ML3R                       | HAMSTER | 0.01    | 18   |
| ML3R                       | HAMSTER | 0.03    | 52   |
| ML3R                       | HAMSTER | 0.1     | 66   |
| ML3R                       | HAMSTER | 1       | 96.5 |
| MONOAMINE OXIDASE-A        | HUMAN   | 1       | 16   |
| MONOAMINE OXIDASE-B        | HUMAN   | 1       | -15  |
| mu OPIOID RECEPTOR         | HUMAN   | 1       | 28   |
| MUSCARINIC RECEPTOR M2     | HUMAN   | 1       | -16  |
| MUSCARINIC RECEPTOR M4     | HUMAN   | 1       | 2    |
| NICOTINIC RECEPTOR, MUSCLE | HUMAN   | 1       | 4    |
| NOREPINEPHRINE TRANSPORTER | HUMAN   | 1       | 5    |
| PCP RECEPTOR               | RAT     | 1       | -2   |
| PHOSPHODIESTERASE 5        | HUMAN   | 1       | -1   |
| PPARgamma                  | HUMAN   | 1       | -3   |
| PROSTAGLANDIN F RECEPTOR   | HUMAN   | 1       | 8    |
| SEROTONIN TRANSPORTER      | HUMAN   | 1       | 1    |
| SIGMA                      | HUMAN   | 1       | 2    |
| SODIUM CHANNEL (Site 2)    | RAT     | 1       | 13   |
| SOMATOSTATIN RECEPTOR 4    | HUMAN   | 1       | 20   |
| XANTHINE OXIDASE           | BOVINE  | 1       | 8    |
| ZAP70                      | HUMAN   | 1       | 10   |

**Results for RO6931643**

| <b>Target/binding site</b>                  | <b>Species</b> | <b>Concentration<br/>(<math>\mu</math>M)</b> | <b>% Inhibition of<br/>control</b> |
|---------------------------------------------|----------------|----------------------------------------------|------------------------------------|
| 5HT1A                                       | HUMAN          | 1                                            | 18                                 |
| 5HT2A                                       | HUMAN          | 1                                            | -18                                |
| 5HT2B                                       | HUMAN          | 1                                            | 18                                 |
| 5HT3                                        | HUMAN          | 1                                            | 12                                 |
| ACETYLCHOLINESTERASE                        | HUMAN          | 1                                            | -3                                 |
| ADENOSINE A1 RECEPTOR                       | HUMAN          | 1                                            | 1                                  |
| ADENOSINE A3 RECEPTOR                       | HUMAN          | 1                                            | 25                                 |
| alpha1A-ADRENOCEPTOR                        | HUMAN          | 1                                            | 5                                  |
| alpha2A-ADRENOCEPTOR                        | HUMAN          | 1                                            | -6                                 |
| ANDROGEN RECEPTOR                           | HUMAN          | 1                                            | 0                                  |
| ANGIOTENSIN CONVERTING ENZYME               | HUMAN          | 1                                            | -6                                 |
| ANGIOTENSIN II RECEPTOR 1                   | HUMAN          | 1                                            | -17                                |
| beta1-ADRENOCEPTOR                          | HUMAN          | 1                                            | 6                                  |
| CA2+ CHANNEL (DILTIAZEM SITE)               | RAT            | 1                                            | 0                                  |
| CDK2                                        | HUMAN          | 1                                            | -5                                 |
| CYCLO OXYGENASE 2                           | HUMAN          | 1                                            | 18                                 |
| DOPAMINE D1 RECEPTOR                        | HUMAN          | 1                                            | 0                                  |
| DOPAMINE D2 RECEPTOR (short)                | HUMAN          | 1                                            | -3                                 |
| ESTROGEN RECEPTOR alpha                     | HUMAN          | 1                                            | 4                                  |
| GABA-A (BENZODIAZAPINE BINDING SITE)        | RAT            | 1                                            | -9                                 |
| GLUCOCORTICOID RECEPTOR                     | HUMAN          | 1                                            | 2                                  |
| GLYCINE RECEPTOR, STRYCHNINE<br>INSENSITIVE | RAT            | 1                                            | 1                                  |
| GSK-3A                                      | HUMAN          | 1                                            | -2                                 |



|                            |         |       |     |
|----------------------------|---------|-------|-----|
| GSK-3B                     | HUMAN   | 1     | 2   |
| HISTAMINE H1 RECEPTOR      | HUMAN   | 1     | 2   |
| HISTAMINE H2 RECEPTOR      | HUMAN   | 1     | -4  |
| HISTAMINE H3 RECEPTOR      | HUMAN   | 1     | -16 |
| HIV-1 PROTEASE             | HUMAN   | 1     | 15  |
| kappa OPIOID RECEPTOR      | RAT     | 1     | 0   |
| ML3R                       | HAMSTER | 0.001 | -19 |
| ML3R                       | HAMSTER | 0.01  | 7   |
| ML3R                       | HAMSTER | 0.03  | 18  |
| ML3R                       | HAMSTER | 0.1   | 51  |
| ML3R                       | HAMSTER | 0.3   | 87  |
| ML3R                       | HAMSTER | 1     | 86  |
| ML3R                       | HAMSTER | 3     | 91  |
| ML3R                       | HAMSTER | 30    | 100 |
| MONOAMINE OXIDASE-A        | HUMAN   | 1     | 12  |
| MONOAMINE OXIDASE-B        | HUMAN   | 1     | -16 |
| mu OPIOID RECEPTOR         | HUMAN   | 1     | 10  |
| MUSCARINIC RECEPTOR M2     | HUMAN   | 1     | 5   |
| MUSCARINIC RECEPTOR M4     | HUMAN   | 1     | -1  |
| NICOTINIC RECEPTOR, MUSCLE | HUMAN   | 1     | -2  |
| NOREPINEPHRINE TRANSPORTER | HUMAN   | 1     | 7   |
| PCP RECEPTOR               | RAT     | 1     | -3  |
| PHOSPHODIESTERASE 5        | HUMAN   | 1     | -10 |
| PPARgamma                  | HUMAN   | 1     | -7  |
| PROSTAGLANDIN F RECEPTOR   | HUMAN   | 1     | -8  |
| SEROTONIN TRANSPORTER      | HUMAN   | 1     | -9  |
| SIGMA                      | HUMAN   | 1     | 0   |

|                         |        |   |     |
|-------------------------|--------|---|-----|
| SODIUM CHANNEL (Site 2) | RAT    | 1 | 35  |
| SOMATOSTATIN RECEPTOR 4 | HUMAN  | 1 | -25 |
| XANTHINE OXIDASE        | BOVINE | 1 | 4   |
| ZAP70                   | HUMAN  | 1 | -2  |

**Supplemental Table 2: Metabolite data of <sup>3</sup>H-RO6958948, <sup>11</sup>C-RO6931643 and <sup>11</sup>C-RO6924963**

|                     | <b><sup>18</sup>F-RO6958948</b> |                   | <b><sup>11</sup>C-RO6931643</b> |                   | <b><sup>11</sup>C-RO6924963</b> |                   |
|---------------------|---------------------------------|-------------------|---------------------------------|-------------------|---------------------------------|-------------------|
| TIME POST INJECTION | RETENTION TIME                  | % DECAY CORRECTED | RETENTION TIME                  | % DECAY CORRECTED | RETENTION TIME                  | % DECAY CORRECTED |
| <b>0 min</b>        |                                 |                   |                                 |                   |                                 |                   |
| Parent              |                                 |                   | 11.8                            | 90.0              | 11.9                            | 94.2              |
| Metabolite 1        |                                 |                   | 3.7                             | 2.8               | 1.3                             | 1.9               |
| Metabolite 2        |                                 |                   | 6.4                             | 3.3               | 7.3                             | 3                 |
| Metabolite 3        |                                 |                   | 9.4                             | 3.9               | 9.1                             | 0.9               |
| <b>5 min</b>        |                                 |                   |                                 |                   |                                 |                   |
| Parent              | 11.4                            | 29.4              | 11.8                            | 30.0              | 11.6                            | 11.9              |
| Metabolite 1        | 0.6                             | 15.4              | 1.2                             | 41.1              | 1.3                             | 67.1              |
| Metabolite 2        | 6.7                             | 18.2              | 6.3                             | 21.9              | 7.3                             | 15.7              |
| Metabolite 3        | 7.7                             | 37                | 8.7                             | 7.0               | 8.8                             | 5.3               |
| <b>10 min</b>       |                                 |                   |                                 |                   |                                 |                   |
| Parent              | 11.5                            | 19.9              | 12.1                            | 18.7              | 11.7                            | 6.3               |
| Metabolite 1        | 0.7                             | 17                | 1.1                             | 50.2              | 1                               | 76.1              |
| Metabolite 2        | 6.6                             | 31.6              | 6.4                             | 27.7              | 7.2                             | 17.2              |
| Metabolite 3        | 7.7                             | 31.5              | 9.5                             | 3.4               | 9.8                             | 0.4               |
| <b>20 min</b>       |                                 |                   |                                 |                   |                                 |                   |
| Parent              | 11.4                            | 10.6              | 12.0                            | 8.8               | 11.7                            | 3.1               |
| Metabolite 1        | 0.8                             | 23.4              | 1.7                             | 59.4              | 1.2                             | 78.4              |
| Metabolite 2        | 6.7                             | 37.5              | 6.5                             | 30.7              | 7.3                             | 14.6              |
| Metabolite 3        | 7.7                             | 28.5              | 8.9                             | 1.2               | 8.6                             | 3.9               |
| <b>30 min</b>       |                                 |                   |                                 |                   |                                 |                   |
| Parent              | 11.5                            | 6.3               | 12.0                            | 8.6               | 11.5                            | 2.3               |
| Metabolite 1        | 0.7                             | 28.1              | 2.2                             | 59.4              | 1.3                             | 79.7              |
| Metabolite 2        | 6.7                             | 41.7              | 6.4                             | 28.5              | 7.2                             | 18                |
| Metabolite 3        | 7.8                             | 23.9              | 8.8                             | 3.5               | 10.5                            | <0.01             |

|               |      |      |      |       |      |      |
|---------------|------|------|------|-------|------|------|
| <b>60 min</b> |      |      |      |       |      |      |
| Parent        | 11.4 | 2.3  | 11.9 | 3.8   | 11.6 | 0.8  |
| Metabolite 1  | 0.9  | 28.3 | 1.9  | 72.1  | 0.8  | 86.8 |
| Metabolite 2  | 6.4  | 49.7 | 6.4  | 24.9  | 7.2  | 10.2 |
| Metabolite 3  | 7.8  | 19.8 | 9.3  | <0.01 | 8.3  | 2.2  |
| <b>90 min</b> |      |      |      |       |      |      |
| Parent        | 11.5 | 0.8  | 11.7 | 2.2   |      |      |
| Metabolite 1  | 0.8  | 38.2 | 2.3  | 77.5  |      |      |
| Metabolite 2  | 6.4  | 43.2 | 6.5  | 19.4  |      |      |
| Metabolite 3  | 7.8  | 17.8 | 8.7  | 0.9   |      |      |
